# Supplementary material for: Room Temperature Syntheses of ZnO and Their Structures
Source: MDPI journal article supplement (doi:10.3390/sym13040733), 2021-04-20
Supplement: s1 [file s1]

## Supplementary Information

### Room Temperature syntheses of ZnO and its structure

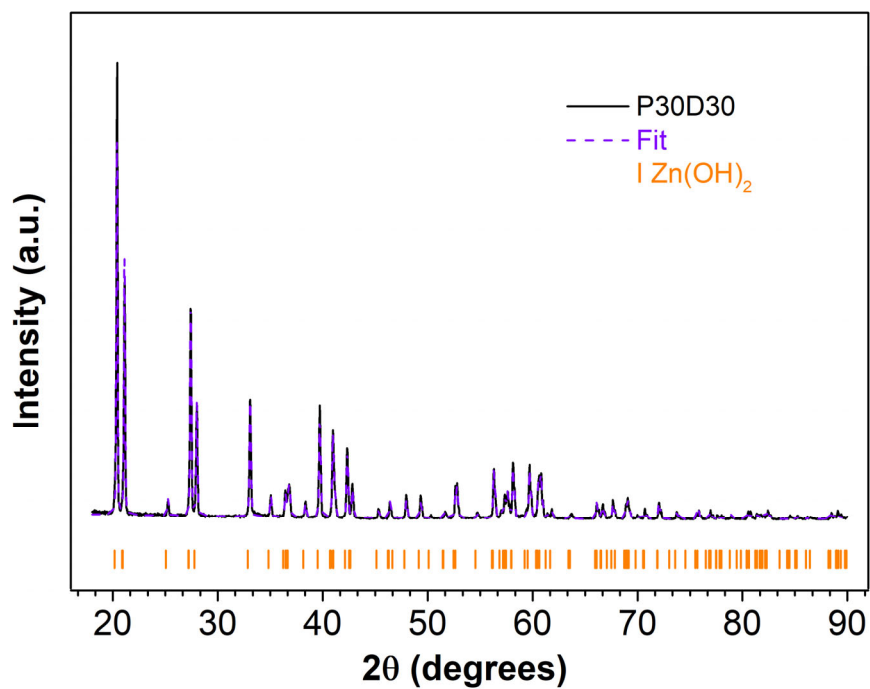

Figure SI1. XRD patterns of the sample P30D30 and associated Rietveld fit.

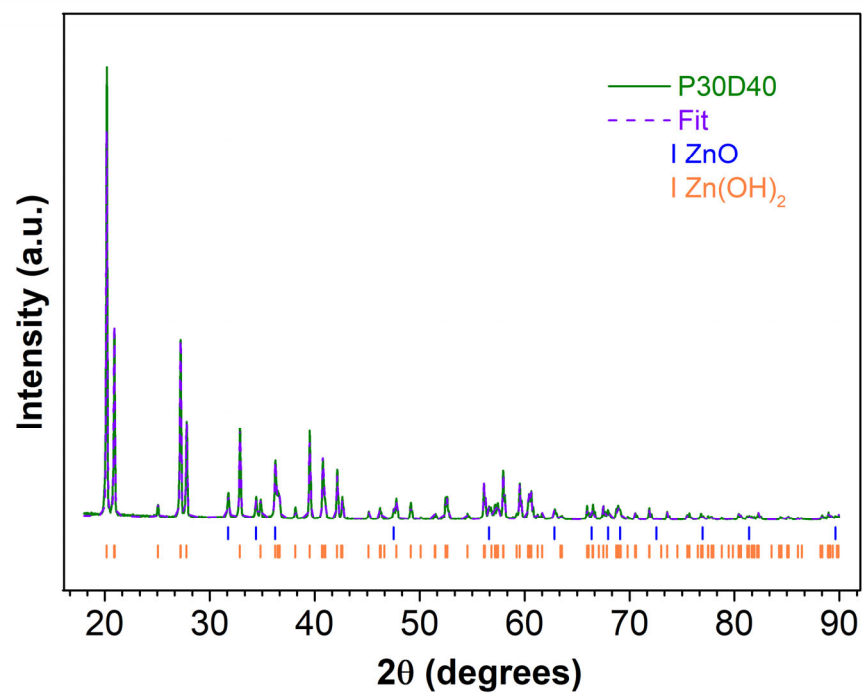

Figure SI2. XRD patterns of the sample P30D40 and associated Rietveld fit.

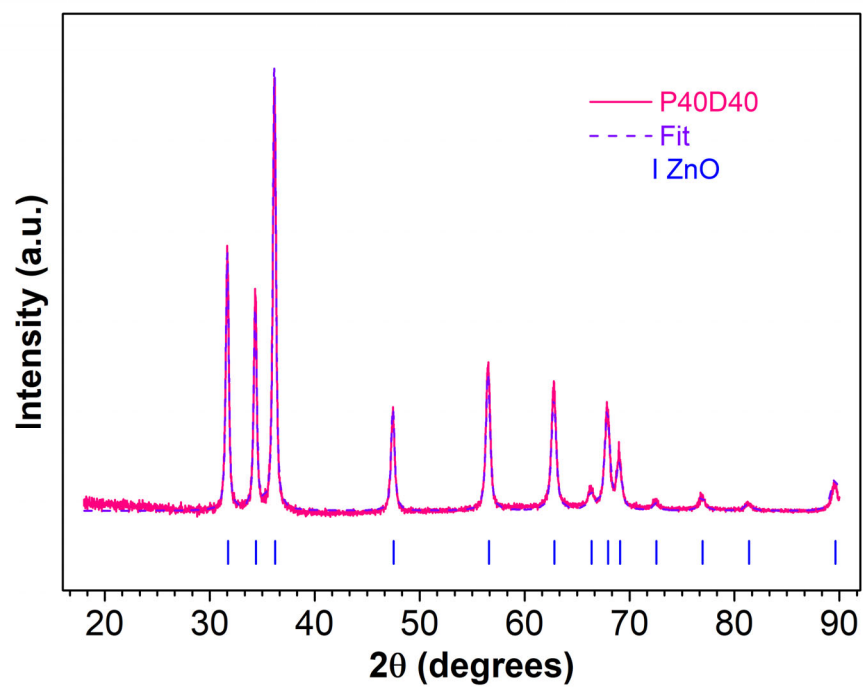

Figure SI3. XRD patterns of the sample P40D40 and associated Rietveld fit.

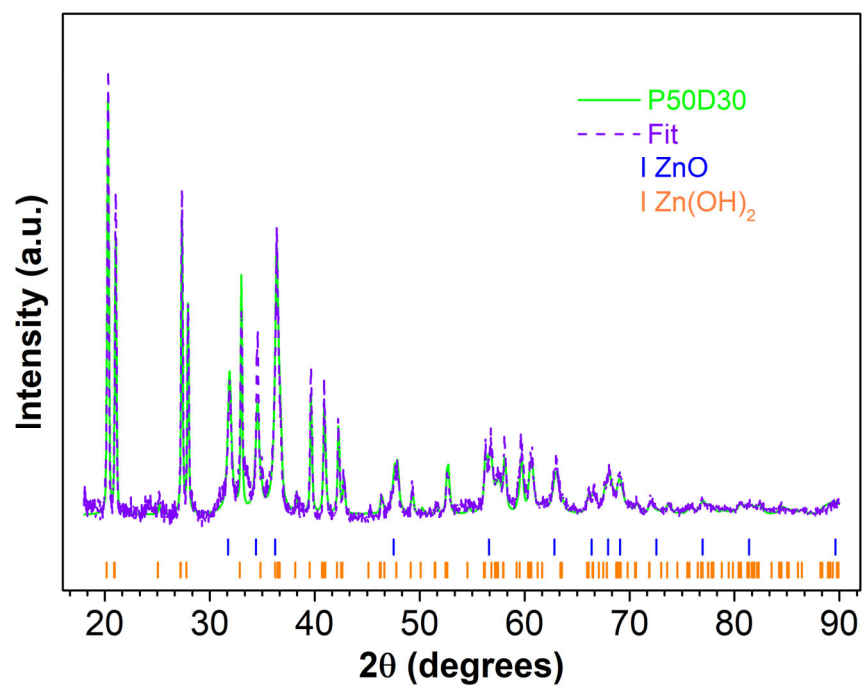

**Figure SI4.** XRD patterns of the sample P50D30 and associated Rietveld fit.

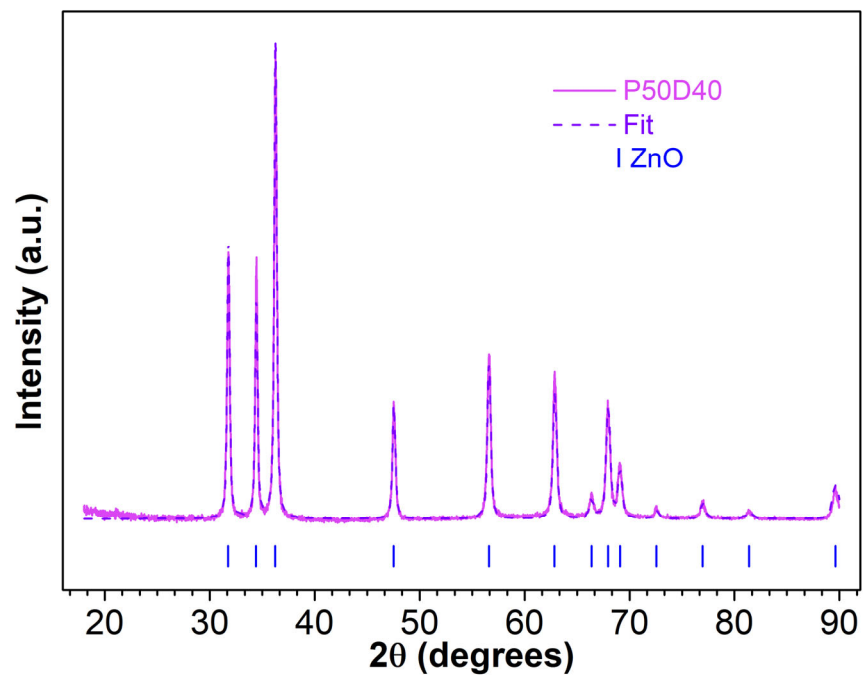

**Figure SI5.** XRD patterns of the sample P50D40 and associated Rietveld fit.

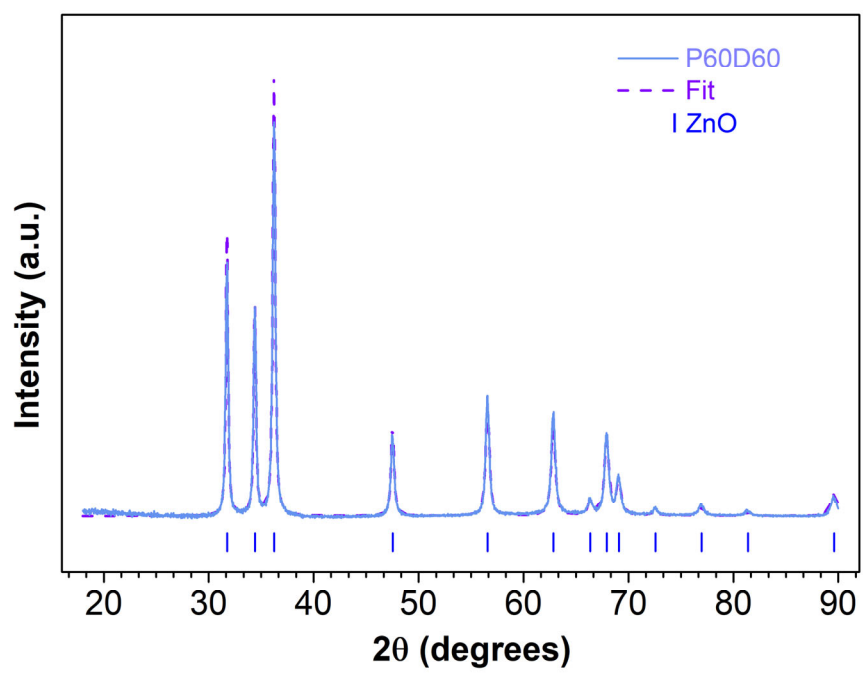

**Figure SI6.** XRD patterns of the sample P60D60 and associated Rietveld fit.
